# Supplementary material for: Subsurface Microbial Habitats in an Extreme Desert Mars-Analog Environment
Source: PubMed Central journal article supplement (PMC6403490; doi:10.3389/fmicb.2019.00069), 2019-02-28
Supplement: Data_Sheet_1.pdf [file Data_Sheet_1.pdf]

**Subsurface microbial habitats in an extreme desert Mars-  
analogue environment**

**Online Supplementary Material**

**Figure S1.** a) Sampling transect in the hyper-arid core of the Atacama Desert, circles along the transect line indicate sampling locations, transect line = 50km (image: Google Earth); b) Schematic indicating relative location of the eleven sampling sites (not to scale). The drill was not deployed for microbiology sampling at sites 3,4,5,7 of the traverse due to terrain and operational constraints on sample recovery. GPS coordinates for each sampling site were: Site 1, 24.76853 S, 69.65059 W, alt. 2053m; Site 2, 24.7721 S, 69.64957 W, alt. 2066m; Site 6, 24.7878 S, 69.60629 W, alt. 2314m; Site 8, 24.63488 S, 69.45376 W, alt. 1984m; Site 9, 24.63493 S, 69.45411 W, alt. 1990m; Site 10, 24.6343 S, 69.45195 W, alt. 1988m.

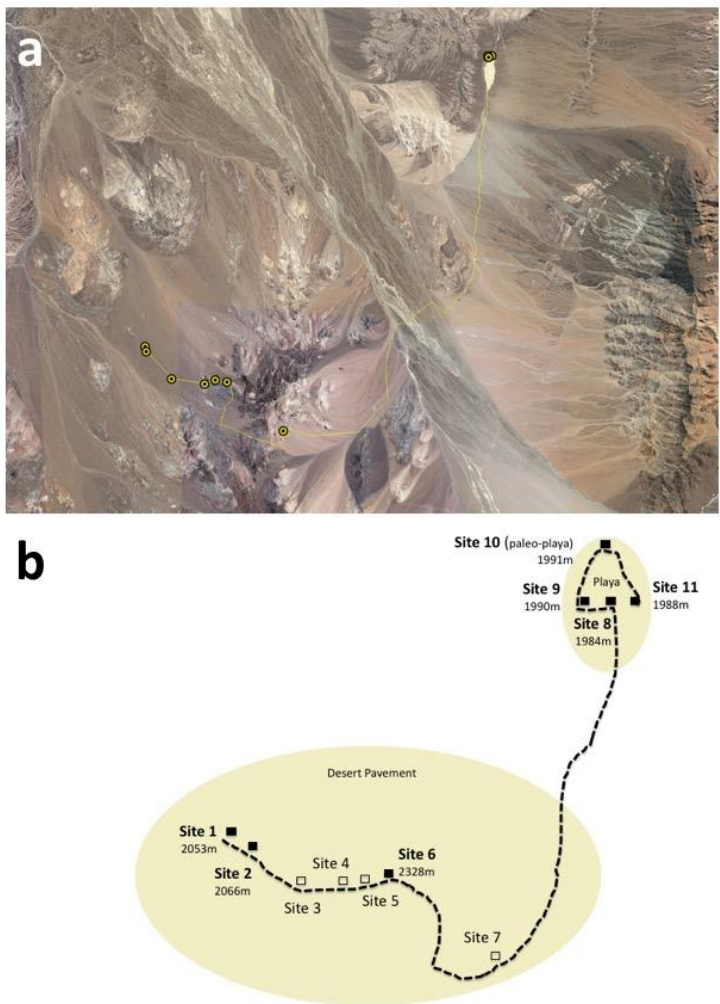

**Figure S2.** The Carnegie Mellon Zöe rover deployed in the Atacama Desert: a) rover showing solar panel dorsal surface (i), drill apparatus (ii), navigation (iii), rover body housing sample analysis and control systems (iv), arrow indicates direction of travel; b) rover deployed next to a human subject for scale (images: Carnegie Mellon University/NASA).

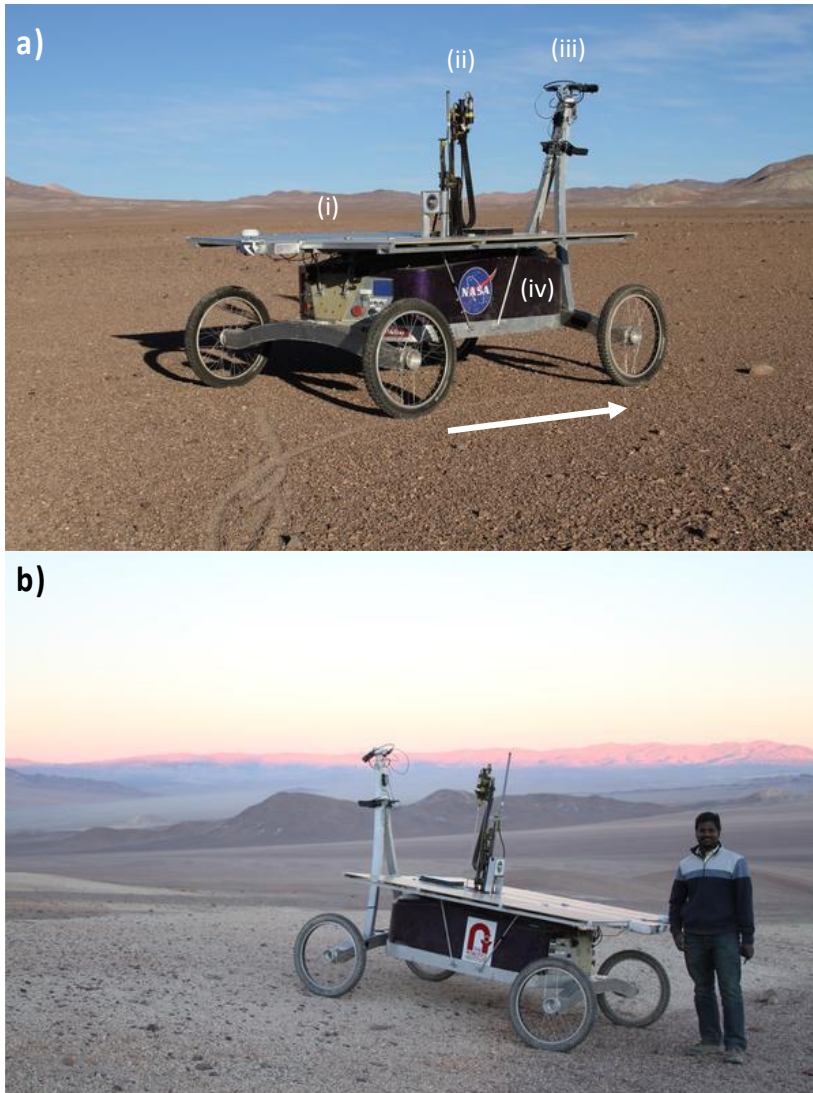

**Figure S3.** The Zöe rover sample recovery and analysis payload: a) drill assembly in the disassembled rover body; b) drill and sample carousel assembly in the disassembled rover body (images: Carnegie Mellon University/NASA), c) drill being deployed in Atacama sediment (image: Kris Zacny).

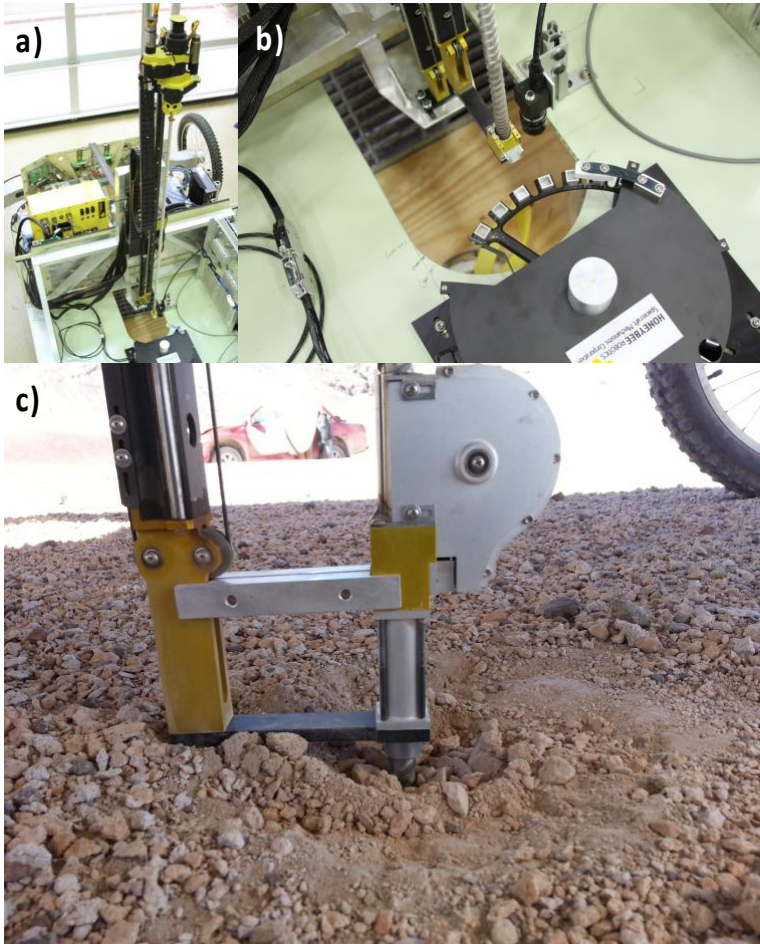

**Figure S4.** Major trends in geochemical variables within subsurface sediments, red symbols = desert pavement; blue symbols = playa. Data for manually collected samples shown here. Variables that did not vary significantly with depth are not plotted. Trend lines were plotted using the Loess Method. Shaded area represents 95% confidence intervals.

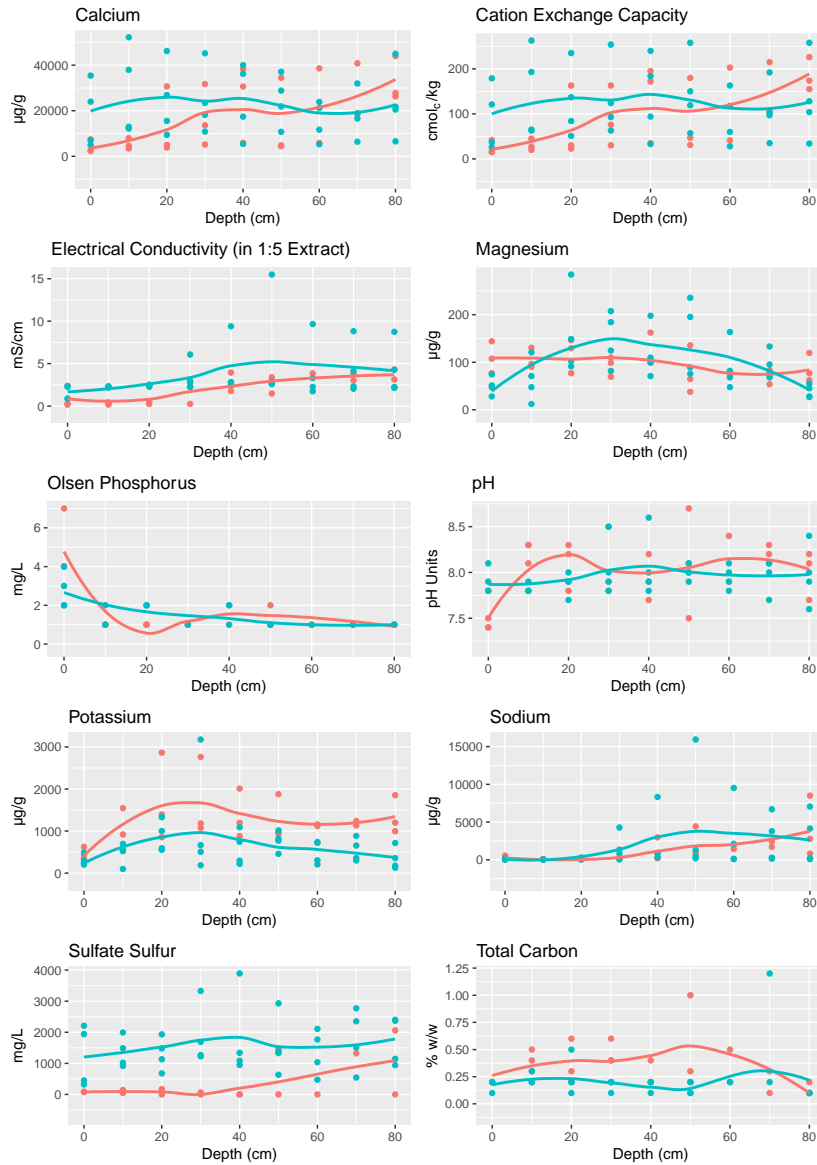

**Figure S5.** Canonical Correspondence Analysis (CCA) triplot with symmetrical scaling indicating differences in sediment geochemistry with terrain and depth as measured in real-time by the MMRS payload on-board the autonomous rover and validated by laboratory Raman spectroscopy.

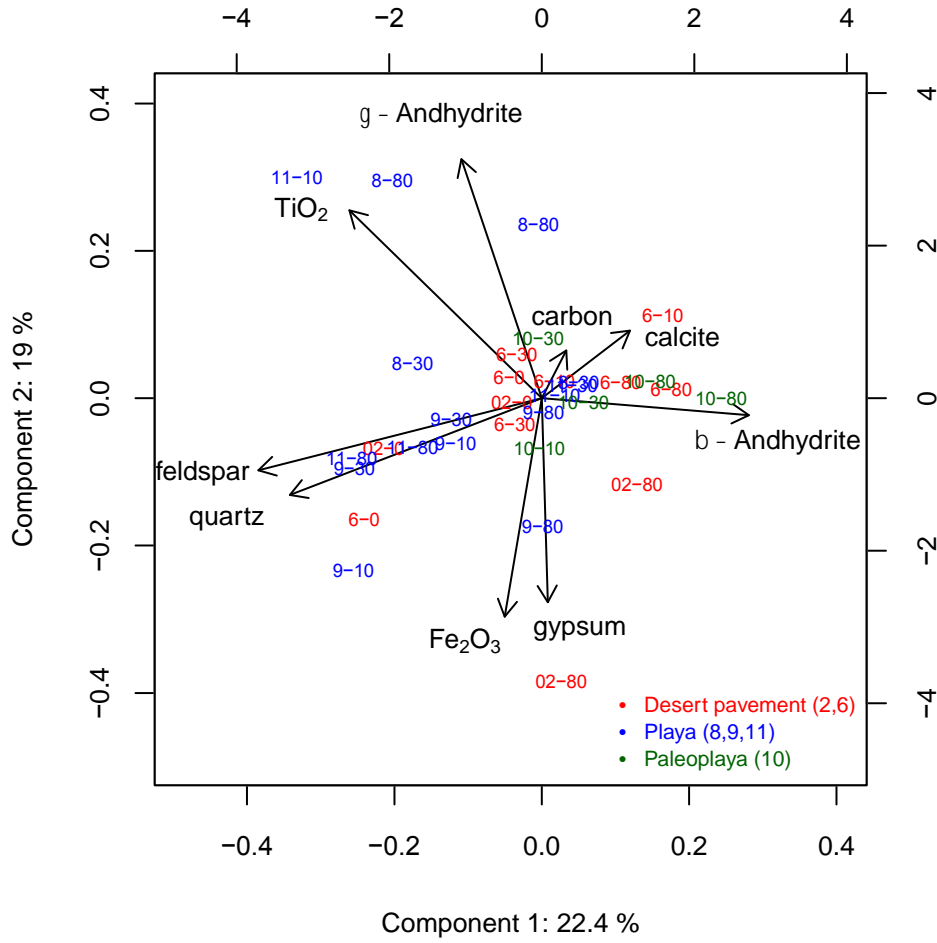

**Figure S6.** Summary plot of temporal trend in sediment temperature and moisture (as relative humidity, RH) in subsurface depth horizon at representative desert pavement site 1. The dataloggers were installed at various depths in manually excavated pit during sample collection for this study, the pits were then backfilled and dataloggers recovered after 14 months recording data *in situ*. A) 10 cm depth, b) 30 cm depth, c) 80 cm depth. The “spike” in RH in June 2014 was due to a rainfall event.

a) 10cm depth

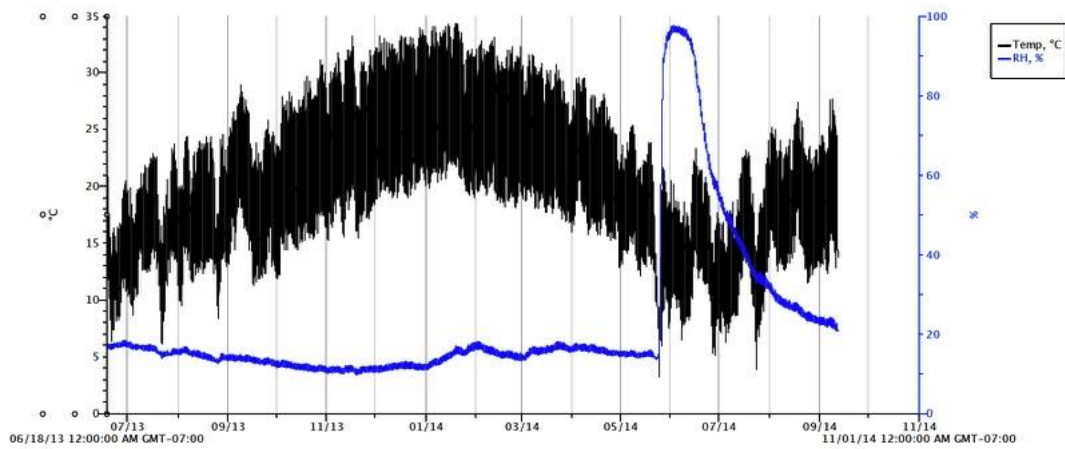

b) 30 cm depth

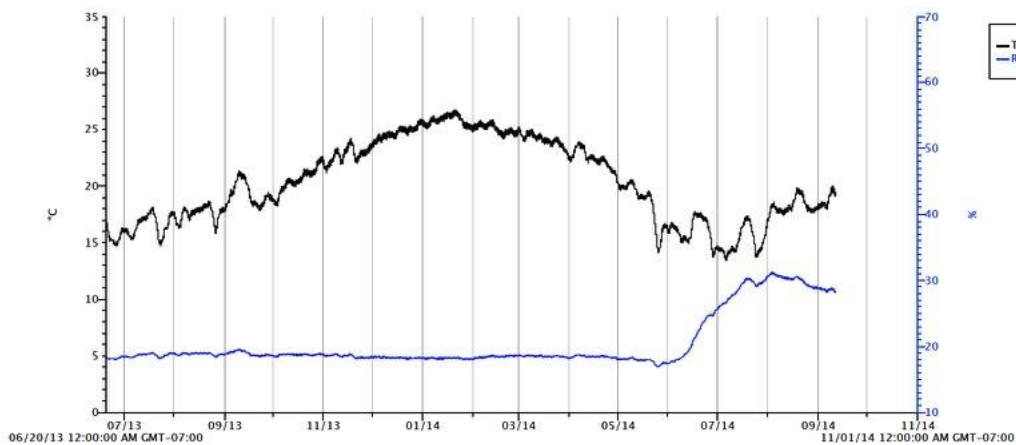

c) 80 cm depth

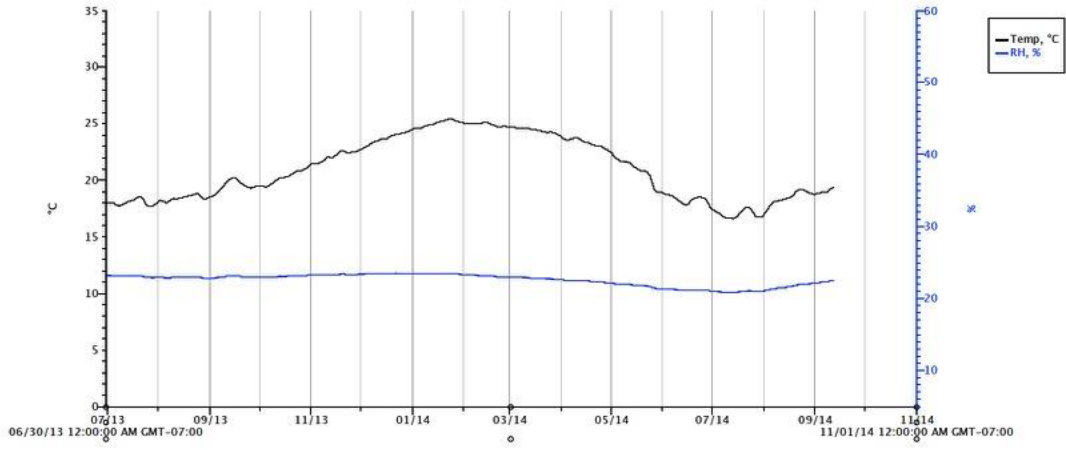



**Figure S7.** Major trends in geochemical variables correlating with bacterial biosignatures in subsurface sediments, red symbols = desert pavement; blue symbols = playa. Data for manually collected samples shown here. Variables that did not vary significantly with depth are not plotted. Trend lines were plotted using the Loess Method. Shaded area represents 95% confidence intervals.

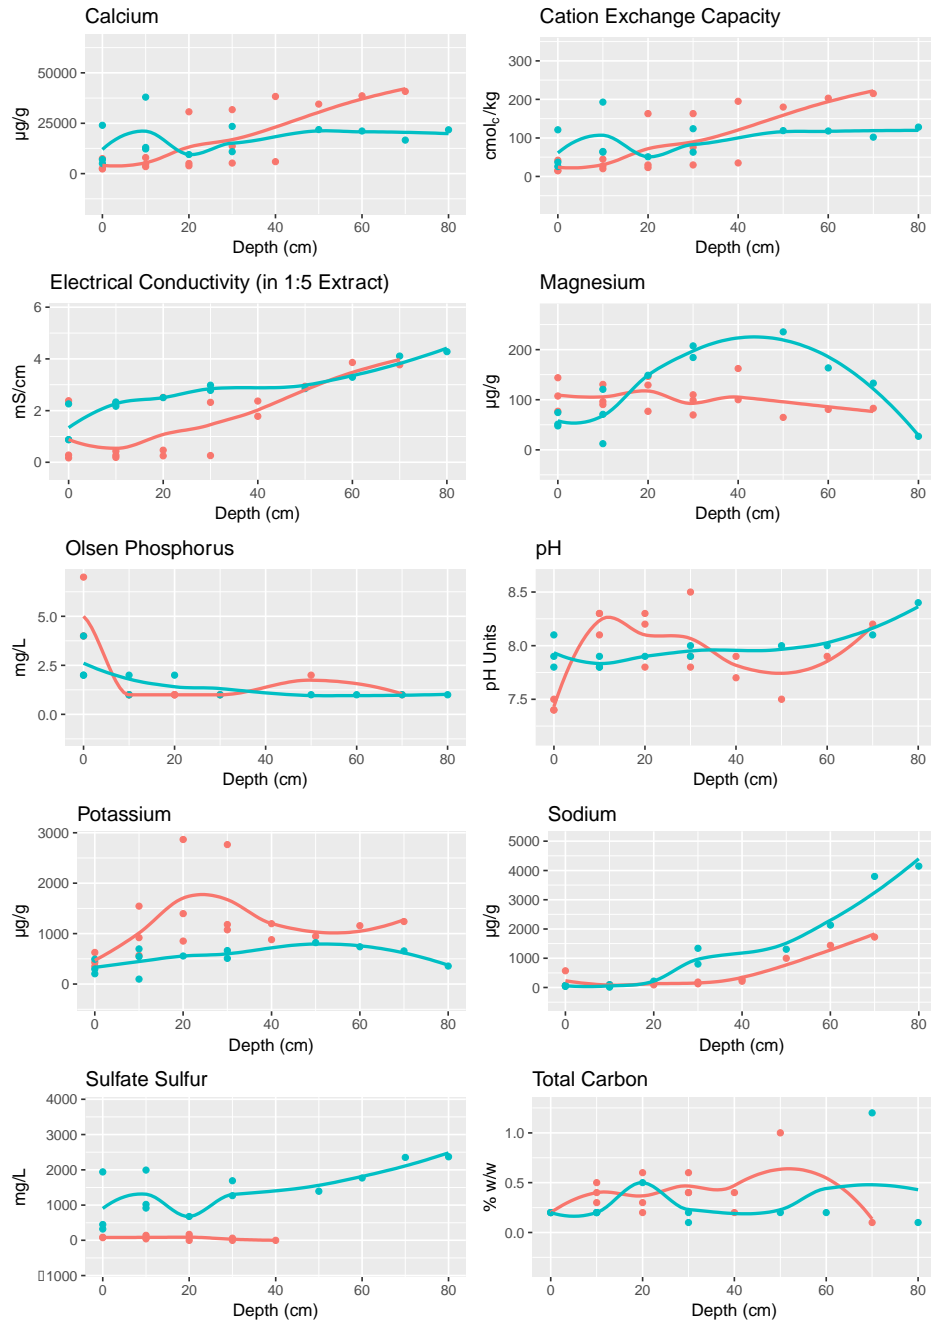

**Figure S8.** Shannon's Diversity estimates (H) for bacterial diversity in vertical sediment horizons from manual recovery (a) and rover recovery (b). Orange symbols = desert pavement; green symbols = playa. Grey shaded area indicates limit for 95% Confidence Intervals.

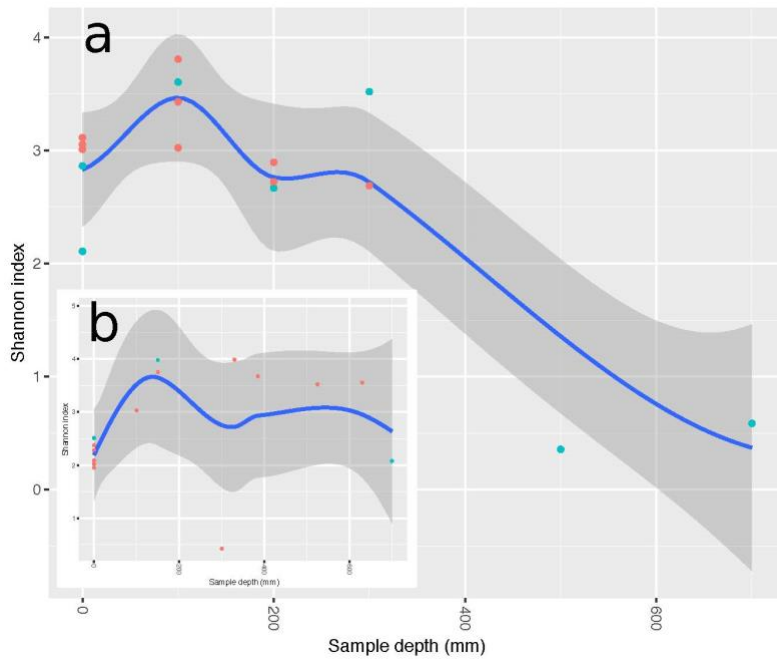

**Figure S9.** Distribution of bacterial diversity by taxonomic class with sediment depth for manual (M) and autonomous rover drill (D) recovered samples yielding amplifiable DNA (see Fig. S5). The numeric suffix after each M and D sample code denote the depth or depth range for samples recovered. Coloured shading indicates relative abundance within each community for a given bacterial class. Sequencing read depth for each sample is given in Table S6.

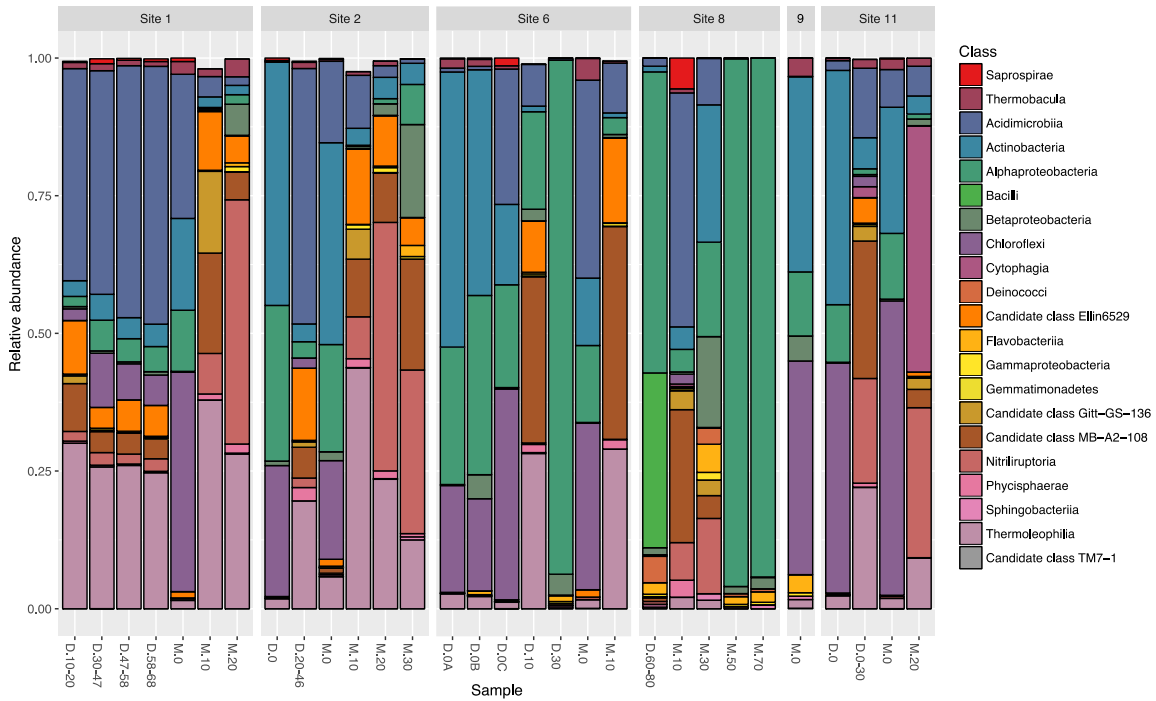

**Table S1.** Comparison of previous microbial diversity estimates for surface-associated hyper-arid sediment in the Atacama Desert (data for arid and semi-arid locations are not included if part of these studies).

| Ref. in main text | Year | Samples | Depth (cm)                                                                                                     | Cultivation                                                                                                                                                                                                      | Biochemical                                                                                                                               | Environmental DNA                                                                                                                                                                                                                                               |
|-------------------|------|---------|----------------------------------------------------------------------------------------------------------------|------------------------------------------------------------------------------------------------------------------------------------------------------------------------------------------------------------------|-------------------------------------------------------------------------------------------------------------------------------------------|-----------------------------------------------------------------------------------------------------------------------------------------------------------------------------------------------------------------------------------------------------------------|
| (1)               | 2003 | 1       | 0-10                                                                                                           | 10 <sup>3</sup> -10 <sup>6</sup> cfu/g sediment; rRNA phylotypes of cultivated strains: Low G-C Gram positives ( <i>Bacillus</i> ) Actinobacteria ( <i>Blastococcus/Geodermatophilus</i> ; <i>Streptomyces</i> ) | Negative for biological activity assayed by labelled substrate release                                                                    | N/A                                                                                                                                                                                                                                                             |
| (2)               | 2006 | 33      | Surface [plus 3 soil pits sampled to 80 cm (n=2) or 90 cm (n=1)]                                               | <10 <sup>5</sup> cfu/g rRNA gene sequences indicated <i>Blastococcus</i> sp. Dominated cultivable taxa. Only 1 of 18 sub-surface samples yielded cultivable bacteria <10 <sup>2</sup> cfu/g.                     | N/A                                                                                                                                       | N/A                                                                                                                                                                                                                                                             |
| (3)               | 2006 | 1       | 25-30                                                                                                          | Unspecified cultivable bacteria                                                                                                                                                                                  | N/A                                                                                                                                       | DGGE fingerprinting: Actinobacteria, Gammaproteobacteria, Gemmatimonadetes, Planctomycetes                                                                                                                                                                      |
| (4)               | 2007 | 7       | 2-20                                                                                                           | 10 <sup>2</sup> -10 <sup>3</sup> cfu/g sediment                                                                                                                                                                  | PLFA estimate: 10 <sup>5</sup> -10 <sup>6</sup> cells/g Corresponding to Actinobacteria, Firmicutes, Proteobacteria                       | Clone libraries: 6 taxa from four phyla: Actinobacteria, Firmicutes, Proteobacteria, Thermi                                                                                                                                                                     |
| (5)               | 2007 | 3       | 0-15                                                                                                           | 10 <sup>3</sup> cfu/g sediment; rRNA phylotypes of cultivated strains: <i>Bacillus</i> ; Bradyrhizobiaceae; <i>Rhodopseudomonas</i>                                                                              | PLFA estimate: 10 <sup>6</sup> -10 <sup>7</sup> cells/g                                                                                   | N/A                                                                                                                                                                                                                                                             |
| (6)               | 2013 | 45      | 0-10                                                                                                           | 10 <sup>3</sup> cfu/g sediment                                                                                                                                                                                   | Positive for labelled substrate mineralization in sediment microcosms                                                                     | Pyrosequencing (library sizes 200-1000 filtered reads), 14 phyla: Actinobacteria 72-88%, Acidobacteria 3.8-6.6%, Proteobacteria 2.2-9.2%                                                                                                                        |
| (7)               | 2018 | 6       | 0-30 [the study also included 3 sub-surface samples, at 50 cm (n=1) and 100 cm (n=2) taken after a rain event] | <10 <sup>2</sup> 16S rRNA gene copies/g sediment estimated using qPCR                                                                                                                                            | 10 <sup>4</sup> -10 <sup>5</sup> endospores/g sediment (as dipicolinic acid); positive ATP, fluorescein diacetate hydrolysis, PLFA assays | Illumina sequencing (unspecified filtered library sizes) 19 bacterial phyla: highly variable, near surface dominated by Actinobacteria, at depth dominated by Firmicutes and Proteobacteria. Also reports 11 fungal phyla spanning ascomycota and basidiomycota |

## References

1. Navarro-Gonzalez R, et al. (2003) Mars-like soils in the Atacama Desert, Chile, and the dry limit of microbial life. *Science* (80- ) 302(5647):1018–1021.
2. Bagaley DR (2006) Uncovering bacterial diversity on and below the surface of a hyper-arid environment, The Atacama Desert, Chile. Dissertation (Louisiana State University).
3. Drees KP, et al. (2006) Bacterial community structure in the hyperarid core of the Atacama Desert, Chile. *Appl Env Microbiol* 72(12):7902–7908.
4. Connon SSA, Lester EDE, Shafaat HHS, Obenhuber DC, Ponce A (2007) Bacterial diversity in hyperarid Atacama Desert soils. *J Geophys Res - Biogeosci* 112(G4):G04S17.
5. Lester ED, Satomi M, Ponce A (2007) Microflora of extreme arid Atacama Desert soils. *Soil Biol Biochem* 39(2):704–708.
6. Crits-Christoph A, et al. (2013) Colonization patterns of soil microbial communities in the Atacama Desert. *Microbiome* 1(1):28.
7. Schulze-Makuch D, et al. (2018) Transitory microbial habitat in the hyperarid Atacama Desert. *Proc Natl Acad Sci U S A* 115(11):2670–2675.

**Table S2.** Mineral distribution estimated by laser Raman spectroscopy as measured in real-time by the on-board the autonomous rover (MMRS) and laboratory validation (Lab). All values are relative abundance estimates.

| Site | Depth (cm) | Raman method | gypsum | <i>b</i> -anhydrite | g-anhydrite | calcite | quartz | feldspar | carbon |
|------|------------|--------------|--------|---------------------|-------------|---------|--------|----------|--------|
| 2    | 0          | MMRS         | 0      | 0                   | 0           | 0       | 3      | 7        | 0      |
|      | 0          | Lab          | 0      | 0                   | 0           | 0       | 14     | 13       | 0      |
|      | 80         | MMRS         | 21.5   | 13                  | 0           | 0       | 0      | 0        | 0      |
|      | 80         | Lab          | 21.5   | 12                  | 0           | 2       | 2      | 4        | 0      |
| 6    | 0          | MMRS         | 0      | 0                   | 0           | 0       | 2      | 6        | 0      |
|      | 0          | Lab          | 0      | 0                   | 0           | 0       | 9      | 18       | 0      |
|      | 10         | MMRS         | 0      | 0                   | 0           | 32      | 1      | 0        | 0      |
|      | 10         | Lab          | 0      | 0                   | 0           | 7       | 3      | 4        | 0      |
|      | 30         | MMRS         | 4      | 0                   | 0           | 1       | 8.5    | 2.5      | 0      |
|      | 30         | Lab          | 0      | 0                   | 0.5         | 2.5     | 5      | 4        | 0      |
|      | 80         | MMRS         | 0      | 28                  | 0           | 0       | 1.5    | 0        | 0      |
|      | 80         | Lab          | 0      | 11.5                | 0           | 0       | 0      | 1        | 0      |
| 8    | 30         | MMRS         | 0      | 0                   | 0           | 0       | 2      | 0        | 0      |
|      | 30         | Lab          | 2      | 0                   | 0           | 4       | 7      | 10       | 0      |
|      | 80         | MMRS         | 1      | 3.5                 | 1.5         | 1       | 3      | 0        | 1      |
|      | 80         | Lab          | 2      | 2                   | 2           | 1.5     | 5      | 7        | 0      |
| 9    | 10         | MMRS         | 2      | 0                   | 0           | 0       | 19     | 0.5      | 0      |
|      | 10         | Lab          | 8      | 0                   | 0           | 0       | 18     | 12       | 0      |
|      | 30         | MMRS         | 9      | 0                   | 0           | 0       | 9      | 5        | 0      |
|      | 30         | Lab          | 8      | 0                   | 0           | 0       | 12     | 16       | 0      |
|      | 80         | MMRS         | 27     | 0                   | 0           | 0       | 4      | 3        | 0      |
|      | 80         | Lab          | 10     | 0                   | 0           | 0       | 10     | 0        | 2      |
| 10   | 0          | MMRS         | 0      | 0                   | 0           | 0       | 1      | 0        | 0      |
|      | 0          | Lab          | 6      | 3                   | 1           | 0       | 1      | 1        | 0      |
|      | 10         | MMRS         | 7      | 0                   | 0           | nd      | 1      | 1        | 0      |
|      | 10         | Lab          | 11     | 0                   | 0           | 1       | 4.5    | 3        | 0      |
|      | 30         | MMRS         | 4.5    | 1                   | 0           | 1       | 1      | 1        | 0      |
|      | 30         | Lab          | 7      | 3                   | 1           | 3       | 3      | 3        | 0      |
|      | 80         | MMRS         | 0      | 18                  | 0           | 0       | 0      | 0        | 0      |
|      | 80         | Lab          | 0      | 47                  | 0           | 0       | 3      | 0        | 0      |
| 11   | 10         | MMRS         | 1      | 0                   | 0           | 0       | 3      | 2        | 0      |
|      | 10         | Lab          | 0      | 0                   | 1           | 0       | 6.5    | 9        | 0      |
|      | 30         | MMRS         | 0      | 0                   | 0           | 0       | 3      | 0        | 0      |
|      | 30         | Lab          | 1      | 0                   | 1           | 0       | 11     | 2        | 0      |
|      | 80         | MMRS         | 11     | 0                   | 0           | 0       | 17     | 3        | 0      |
|      | 80         | Lab          | 5      | 0                   | 0           | 0       | 16     | 13       | 0      |

**Table S3.** Sediment geochemistry and DNA yield for desert pavement and playa depth horizons (italicized entries indicate DNA also recovered using autonomous rover sampling, shown in Fig. S4). Dashed lines indicate value not detected. Y = yes, N = No, ND = not detected, NT or - = not tested.

| Site | Site type       | Sediment depth<br>cm | DNA yield (ng/g) | Sequence data acquired (Y/N),<br>DNA also from rover samples | Bulk density |          | Electrical conductivity (EC) |      | Soluble salts |       | C/N Ratio |       | Total carbon |     | Total nitrogen |          | Olsen phosphorus |          | Sulfate sulfur |       | Extractable organic sulfur |        | Anion storage capacity |        | Cation exchange capacity |      |          |      |
|------|-----------------|----------------------|------------------|--------------------------------------------------------------|--------------|----------|------------------------------|------|---------------|-------|-----------|-------|--------------|-----|----------------|----------|------------------|----------|----------------|-------|----------------------------|--------|------------------------|--------|--------------------------|------|----------|------|
|      |                 |                      |                  |                                                              | g/mL         | pH units | mS/cm                        | %    | % w/w         | % w/w | mg/L      | mg/kg | mg/kg        | %   | meq/100g       | meq/100g | µg/g             | meq/100g | µg/g           | µg/g  | meq/100g                   | µg/g   | meq/100g               | µg/g   | meq/100g                 | µg/g | meq/100g | µg/g |
| 1    | Desert Pavement | 0                    | 3.36             | Y                                                            | 1.27         | 7.9      | 0.28                         | 0.1  | 9.2           | <0.1  | <0.04     | 4     | 88           | <2  | <15            | 15       | 0.9              | 335.9    | 12.8           | 2360  | 0.88                       | 107.96 | 0.23                   | 86.7   |                          |      |          |      |
| 1    | Desert Pavement | 10                   | 3.08             | Y                                                            | 1.26         | 8.3      | 0.19                         | 0.07 | 22.3          | 0.3   | <0.04     | 1     | 43           | <2  | <15            | 37       | 2.93             | 918.83   | 23.2           | 4640  | 0.79                       | 96.38  | 0.38                   | 85.7   |                          |      |          |      |
| 1    | Desert Pavement | 20                   | <0.067           | Y                                                            | 1.29         | 8.3      | 0.23                         | 0.09 | 9             | 0.3   | <0.04     | 1     | 99           | <2  | <15            | 30       | 3.57             | 1395.87  | 25.2           | 3040  | 1.06                       | 129.32 | 0.66                   | 131.8  |                          |      |          |      |
| 1    | Desert Pavement | 30                   | <0.067           | Y                                                            | 1.26         | 7.9      | 0.25                         | 0.81 | 40.9          | 0.4   | <0.04     | <1    | -            | -   | -              | 163      | 2.73             | 1075.23  | 138.6          | 31720 | 0.9                        | 109.8  | 0.65                   | 149.3  |                          |      |          |      |
| 1    | Desert Pavement | 40                   | <0.067           | Y                                                            | 1.41         | 7.7      | 2.37                         | 0.83 | 33.7          | 0.2   | <0.04     | <1    | -            | -   | -              | 195      | 2.25             | 879.75   | 191.4          | 38280 | 0.82                       | 100.04 | 0.94                   | 216.2  |                          |      |          |      |
| 1    | Desert Pavement | 50                   | <0.067           | Y                                                            | 1.34         | 7.9      | 2.94                         | 1.03 | 16.2          | 1     | 0.06      | 2     | -            | -   | -              | 180      | 2.42             | 946.22   | 172.4          | 34480 | 0.53                       | 64.66  | 4.34                   | 998.2  |                          |      |          |      |
| 1    | Desert Pavement | 60                   | <0.067           | Y                                                            | 1.46         | 7.9      | 3.86                         | 1.33 | 3.4           | <0.1  | <0.04     | <1    | -            | -   | -              | 203      | 2.96             | 1137.36  | 193            | 38600 | 0.66                       | 80.52  | 6.26                   | 1439.8 |                          |      |          |      |
| 1    | Desert Pavement | 70                   | <0.067           | Y                                                            | 1.44         | 8.2      | 3.77                         | 1.32 | 3             | 0.1   | <0.04     | 1     | -            | -   | -              | 215      | 3.17             | 1239.47  | 204            | 40800 | 0.68                       | 82.96  | 7.5                    | 1723   |                          |      |          |      |
| 1    | Desert Pavement | 80                   | <0.067           | N                                                            | 1.48         | 8.1      | 4.31                         | 1.51 | 3             | 0.2   | 0.06      | 1     | -            | -   | -              | 155      | 3.07             | 1200.37  | 139            | 27800 | 0.51                       | 62.22  | 12.08                  | 2778.4 |                          |      |          |      |
| 2    | Desert Pavement | 0                    | <0.067           | Y                                                            | 1.49         | 7.4      | 2.38                         | 0.33 | 21.3          | 0.2   | <0.04     | 4     | -            | -   | -              | 42       | 1.6              | 625.6    | 37.3           | 7460  | 0.63                       | 76.86  | 2.48                   | 370.4  |                          |      |          |      |
| 2    | Desert Pavement | 10                   | 3.28             | Y                                                            | 1.12         | 8.3      | 0.27                         | 0.09 | 12.6          | 0.4   | <0.04     | 1     | 69           | <2  | <15            | 20       | 1.45             | 566.95   | 17.3           | 3460  | 0.74                       | 90.28  | 0.28                   | 64.4   |                          |      |          |      |
| 2    | Desert Pavement | 20                   | <0.067           | Y                                                            | 1.37         | 8.2      | 0.47                         | 0.16 | 10.8          | 0.2   | <0.04     | 1     | 170          | <2  | <15            | 23       | 2.18             | 852.38   | 19.3           | 3860  | 0.63                       | 76.86  | 0.39                   | 89.7   |                          |      |          |      |
| 2    | Desert Pavement | 30                   | <0.067           | Y                                                            | 1.34         | 8.5      | 0.26                         | 0.09 | 67.4          | 0.6   | <0.04     | 1     | 62           | <2  | 24             | 30       | 3.02             | 1180.82  | 26             | 5200  | 0.81                       | 98.82  | 0.35                   | 126.3  |                          |      |          |      |
| 2    | Desert Pavement | 40                   | <0.067           | Y                                                            | 1.55         | 7.9      | 1.78                         | 0.82 | 40.4          | 0.4   | <0.04     | <1    | 0            | -   | -              | 35       | 3.06             | 1196.46  | 29.6           | 5920  | 1.33                       | 162.26 | 1.21                   | 278.3  |                          |      |          |      |
| 2    | Desert Pavement | 50                   | <0.067           | N                                                            | 1.48         | 8.1      | 1.48                         | 0.52 | 37.9          | 0.3   | <0.04     | 1     | 0            | -   | -              | 31       | 2.45             | 957.95   | 24             | 4800  | 1.11                       | 135.42 | 2.97                   | 683.1  |                          |      |          |      |
| 2    | Desert Pavement | 60                   | <0.067           | N                                                            | 1.53         | 8.4      | -                            | -    | 28.3          | 0.5   | <0.04     | 1     | 0            | -   | -              | 41       | 2.86             | 1118.26  | 29.3           | 3860  | 0.6                        | 73.2   | 8.3                    | 1933   |                          |      |          |      |
| 2    | Desert Pavement | 70                   | <0.067           | N                                                            | 1.49         | 8.3      | 3.03                         | 1.06 | 18.8          | 0.3   | <0.04     | <1    | 1.321        | <2  | <15            | 106      | 2.9              | 1133.9   | 92.3           | 18460 | 0.44                       | 53.68  | 10.62                  | 2442.6 |                          |      |          |      |
| 2    | Desert Pavement | 80                   | <0.067           | N                                                            | 1.32         | 7.7      | 3.14                         | 1.1  | 3.2           | 0.1   | 0.04      | <1    | 2.060        | <2  | <15            | 226      | 2.55             | 997.03   | 230            | 44000 | 0.63                       | 76.86  | 3.37                   | 821.1  |                          |      |          |      |
| 6    | Desert Pavement | 0                    | 6.207            | Y                                                            | 1.42         | 7.4      | 0.17                         | 0.06 | 6.7           | <0.1  | <0.04     | 7     | 74           | <2  | <15            | 15       | 1.1              | 430.1    | 11.5           | 2300  | 1.18                       | 143.96 | 0.24                   | 35.2   |                          |      |          |      |
| 6    | Desert Pavement | 10                   | 1.083            | Y                                                            | 1.22         | 8.1      | 0.43                         | 0.13 | 11.5          | 0.5   | 0.05      | 1     | 141          | <2  | 30             | 45       | 3.95             | 1544.43  | 39.8           | 7960  | 1.07                       | 130.54 | 0.4                    | 92     |                          |      |          |      |
| 6    | Desert Pavement | 20                   | <0.067           | Y                                                            | 1.23         | 7.8      | 2.31                         | 0.88 | 44.9          | 0.6   | <0.04     | 1     | 0            | -   | -              | 163      | 7.33             | 2866.03  | 153.4          | 30680 | 1.2                        | 146.4  | 0.62                   | 142.6  |                          |      |          |      |
| 6    | Desert Pavement | 30                   | <0.067           | Y                                                            | 1.46         | 7.8      | -                            | -    | 29.1          | 0.4   | <0.04     | 1     | 0            | -   | -              | 76       | 7.07             | 2764.37  | 68             | 13600 | 0.57                       | 69.54  | 0.61                   | 186.3  |                          |      |          |      |
| 6    | Desert Pavement | 40                   | <0.067           | N                                                            | 1.29         | 8.2      | 3.53                         | 1.36 | 1.9           | <0.1  | <0.04     | 2     | 0            | -   | -              | 172      | 5.14             | 2009.74  | 133.1          | 30620 | 0.86                       | 104.92 | 12.91                  | 2969.3 |                          |      |          |      |
| 6    | Desert Pavement | 50                   | <0.067           | N                                                            | 1.48         | 8.7      | 3.39                         | 1.19 | 0.8           | <0.1  | 0.05      | <1    | 1.467        | <2  | <15            | 47       | 4.8              | 1876.8   | 22.3           | 4460  | 0.31                       | 37.82  | 19.29                  | 4436.7 |                          |      |          |      |
| 6    | Desert Pavement | 80                   | <0.067           | N                                                            | 1.33         | 8.2      | -                            | -    | 0.5           | 0.1   | 0.26      | 1     | 0            | -   | -              | 174      | 4.74             | 1853.34  | 131.4          | 26280 | 0.98                       | 119.56 | 37                     | 8510   |                          |      |          |      |
| 8    | Playa           | 0                    | 0.661            | Y                                                            | 0.99         | 7.8      | 2.26                         | 0.79 | 13.6          | 0.2   | <0.04     | 4     | 1.940        | <2  | 43             | 121      | 0.76             | 297.16   | 119.9          | 23980 | 0.39                       | 47.58  | 0.24                   | 35.2   |                          |      |          |      |
| 8    | Playa           | 10                   | 0.597            | Y                                                            | 0.89         | 7.8      | 2.3                          | 0.8  | 12.4          | 0.2   | <0.04     | 2     | 1.992        | <2  | 41             | 193      | 1.78             | 693.98   | 189.7          | 37940 | 0.99                       | 120.78 | 0.22                   | 50.6   |                          |      |          |      |
| 8    | Playa           | 20                   | <0.067           | N                                                            | 0.96         | 8        | 2.43                         | 0.85 | 9.6           | 0.2   | <0.04     | 2     | 1.131        | <2  | 39             | 84       | 2.56             | 1000.96  | 77.6           | 15320 | 1.33                       | 284.26 | 1.37                   | 315.1  |                          |      |          |      |
| 8    | Playa           | 30                   | <0.067           | Y                                                            | 1.12         | 7.9      | 2.78                         | 0.97 | 11.8          | 0.2   | <0.04     | 1     | 1.690        | <2  | 34             | 124      | 1.7              | 664.7    | 117.3          | 23460 | 1.7                        | 207.4  | 3.49                   | 802.7  |                          |      |          |      |
| 8    | Playa           | 40                   | ND               | N                                                            | 1.04         | 7.9      | 2.78                         | 0.97 | 6.5           | 0.2   | <0.04     | 2     | 949          | <2  | 35             | 94       | 1.91             | 746.81   | 87.1           | 17420 | 1.62                       | 197.64 | 3.75                   | 862.3  |                          |      |          |      |
| 8    | Playa           | 50                   | <0.067           | Y                                                            | 0.98         | 8        | 2.83                         | 1    | 7.1           | 0.2   | <0.04     | 1     | 1.993        | <2  | 37             | 119      | 2.1              | 821.1    | 109.3          | 21860 | 1.93                       | 235.46 | 5.89                   | 1308.7 |                          |      |          |      |
| 8    | Playa           | 60                   | NT               | Y                                                            | 0.95         | 8        | 3.29                         | 1.15 | 6.5           | 0.2   | <0.04     | 1     | 1.766        | <2  | 29             | 118      | 1.89             | 738.99   | 105.7          | 21540 | 1.34                       | 163.48 | 9.38                   | 2134.4 |                          |      |          |      |
| 8    | Playa           | 70                   | <0.067           | Y                                                            | 0.96         | 8.1      | 4.11                         | 1.44 | 32.2          | 1.2   | <0.04     | 1     | 2.350        | <2  | 31             | 102      | 1.68             | 656.88   | 83             | 16600 | 1.09                       | 132.98 | 16.31                  | 3797.3 |                          |      |          |      |
| 8    | Playa           | 80                   | <0.067           | Y                                                            | 1.2          | 8.4      | 4.28                         | 1.5  | 5.4           | 0.1   | <0.04     | 1     | 2.370        | <2  | 16             | 128      | 0.91             | 355.81   | 108.8          | 21760 | 0.22                       | 26.84  | 18.04                  | 4149.2 |                          |      |          |      |
| 9    | Playa           | 0                    | <0.067           | Y                                                            | 1.41         | 7.9      | 0.88                         | 0.31 | 15.6          | 0.2   | <0.04     | 2     | 449          | <2  | <15            | 26       | 0.52             | 203.32   | 25.1           | 5020  | 0.42                       | 51.24  | 0.3                    | 69     |                          |      |          |      |
| 9    | Playa           | 10                   | 0.368            | Y                                                            | 1.46         | 7.8      | 2.17                         | 0.76 | 22.1          | 0.1   | <0.04     | <1    | 1.018        | <2  | <15            | 65       | 0.25             | 97.75    | 64.9           | 11980 | 0.1                        | 12.2   | 0.06                   | 13.8   |                          |      |          |      |
| 9    | Playa           | 20                   | ND               | N                                                            | 1.07         | 7.9      | 2.28                         | 0.8  | 11            | 0.2   | <0.04     | 2     | 1.478        | <2  | 21             | 137      | 1.51             | 590.41   | 134.6          | 26920 | 0.84                       | 102.48 | 0.23                   | 52.9   |                          |      |          |      |
| 9    | Playa           | 30                   | <0.067           | N                                                            | 1.41         | 7.8      | 2.24                         | 0.78 | 12.7          | 0.2   | <0.04     | <1    | 1.226        | <2  | <15            | 93       | 0.48             | 187.68   | 91.2           | 18240 | 0.67                       | 81.74  | 0.22                   | 50.6   |                          |      |          |      |
| 9    | Playa           | 40                   | <0.067           | N                                                            | 1.22         | 8        | 2.36                         | 0.9  | 23.1          | 0.2   | <0.04     | 1     | 1.338        | 103 | <15            | 164      | 0.76             | 297.16   | 181.1          | 36220 | 0.58                       | 70.76  | 1.49                   | 342.7  |                          |      |          |      |
| 9    | Playa           | 50                   | NT               | N                                                            | 0.99         | 8        | 2.59                         | 0.91 | 7.9           | 0.2   | <0.04     | <1    | 1.329        | <2  | 34             | 150      | 1.97             | 770.27   | 144.3          | 28860 | 1.6                        | 193.2  | 1.68                   | 386.4  |                          |      |          |      |
| 9    | Playa           | 60                   | <0.067           | N                                                            | 1.48         | 7.8      | 2.26                         | 0.79 | 22.8          | 0.2   | <0.04     | <1    | 1.036        | <2  | <15            | 60       | 0.53             | 207.23   | 58.5           | 11700 | 0.39                       | 47.58  | 0.45                   | 103.3  |                          |      |          |      |
| 9    | Playa           | 70                   | <0.067           | N                                                            | 1.23         | 7.7      | 2.32                         | 0.81 | 14.9          | 0.2   | <0.04     | <1    | 1.508        | <2  | <15            | 97       | 0.77             | 301.07   | 94.5           | 18900 | 0.65                       | 79.3   | 0.69                   | 158.7  |                          |      |          |      |
| 9    | Playa           | 80                   | ND               | N                                                            | 1.48         | 7.6      | 2.23                         | 0.79 | 7.2           | 0.1   | <0.04     | <1    | 1.143        | 16  | <15            | 104      | 0.45             | 175.95   | 102.6          | 20320 | 0.37                       | 45.14  | 0.42                   | 96.6   |                          |      |          |      |
| 11   | Playa           | 0                    | <0.067           | Y                                                            | 1.17         | 8.1      | 0.97                         | 0.3  | 9.8           | 0.2   | <0.04     | 2     | 321          | <2  | 30             | 97       | 1.26             | 492.86   | 34.8           | 6960  | 0.81                       | 76.42  | 0.37                   | 39.1   |                          |      |          |      |
| 11   | Playa           | 10                   | 0.357            | Y                                                            | 1.13         | 7.9      | 2.33                         | 0.82 | 10.3          | 0.2   | <0.04     | 1     | 916          | <2  | 19             | 63       | 1.39             | 543.49   | 61             | 12200 | 0.56                       | 70.76  | 0.42                   | 96.6   |                          |      |          |      |
| 11   | Playa           | 20                   | 0.331            | Y                                                            | 1.24         | 7.9      | 2.5                          | 0.88 | 14.7          | 0.5   | <0.04     | 2     | 676          | <2  | 21             | 51       | 1.42             | 555.22   | 47.3           | 9460  | 1.22                       | 148.04 | 0.95                   | 218.3  |                          |      |          |      |
| 11   | Playa           | 30                   | 0.483            | Y                                                            | 1.23         | 8        | 2.98                         | 1.04 | 5.6           | 0.1   | <0.04     | <1    | 1.266        | <2  | 18             | 83       | 1.3              | 508.3    | 54.3           | 10860 | 1.31                       | 184.22 | 5.93                   | 1340.9 |                          |      |          |      |
| 11   | Playa           | 40                   | <0.067           | N                                                            | 1.41         | 7.8      | 2.83                         | 0.99 | 3.3           | <0.1  | <0.04     | <1    | 1.062        | <2  | <15            | 33       | 0.56             | 218.96   | 27.2           | 3440  | 0.51                       | 68.82  | 4.01                   | 922.3  |                          |      |          |      |
| 11   | Playa           | 50                   | 0.295            | N                                                            | 1.2          | 7.9      | 2.61                         | 0.91 | 4             | 0.1   | <0.04     | 1     | 633          | <2  | <15            | 37       | 1.17             | 457.47   | 33.8           | 10780 | 0.75                       | 89.06  | 0.66                   | 157.8  |                          |      |          |      |
| 11   | Playa           | 60                   | <0.067           | N                                                            | 1.33         | 7.9      | 1.74                         | 0.61 | 6.1           | <0.1  | <0.04     | <1    | 473          | <2  | <15            | 28       | 0.78             | 304.98   | 26.3           | 5260  | 0.67                       | 81.74  | 0.6                    | 138    |                          |      |          |      |
| 11   | Playa           | 70                   | 0.313            | N                                                            | 1.26         | 8.1      | 2.03                         | 0.72 | 7.2           | <0.1  | <0.04     | <1    | 343          | <2  | <15            | 35       | 0.92             | 359.72   | 32.1           | 6420  | 0.78                       | 95.16  | 1.26                   | 289.8  |                          |      |          |      |
| 11   | Playa           | 80                   | <0.067           | N                                                            | 1.57         | 7.9      | 2.35                         | 0.73 | 8.1           | <0.1  | <0.04     | <1    | 948          | <2  | <15            | 36       | 0.33             | 129.03   | 32.9           | 6390  | 0.23                       | 28.06  | 0.45                   | 195.9  |                          |      |          |      |
| 10   | Paleo-playa     | 0                    | ND               | N                                                            | 0.96         | 7.8      | 2.35                         | 0.82 | 10.6          | 0.1   | <0.04     | 3     | 2.210        | <2  | 32             | 179      | 0.62             | 241.42   | 177.2          | 32440 | 0.23                       | 28.06  | 0.87                   | 200.1  |                          |      |          |      |
| 10   | Paleo-playa     | 10                   | ND               | N                                                            | 1.08         | 7.8      | 2.29                         | 0.8  | 30.5          | 0.3   | <0.04     | 3     | 1.485        | 8   | <15            | 263      | 1.94             | 923.94   | 261            | 52200 | 0.39                       | 47.58  | 0.18                   | 41.4   |                          |      |          |      |
| 10   | Paleo-playa     | 20                   | 0.381            | N                                                            | 1.17         | 7.7      |                              |      |               |       |           |       |              |     |                |          |                  |          |                |       |                            |        |                        |        |                          |      |          |      |

**Table S4.** Sediment microclimate variables for representative desert pavement and playa sites.

a) Comparison of gravimetric moisture content in pavement and playa sediment depth horizons.

| Depth | Desert pavement Site 1 (%) | Playa Site 8 (%) |
|-------|----------------------------|------------------|
| 0 cm  | 0.12                       | 2.3              |
| 10 cm | 1.7                        | 10.1             |
| 20 cm | 1.2                        | 8.8              |
| 30 cm | 2.0                        | 13.5             |
| 40 cm | 3.5                        | 15.0             |
| 50 cm | 3.5                        | 16.6             |
| 80 cm | 2.2                        | 8.7              |

b) Summary of depth horizon microclimate variables from *in situ* dataloggers deployed at desert pavement Site 1 at the time of sediment sampling for 14 months (note: playa Site 8 dataloggers were lost as a result of unusual heavy rainfall). A full time series for these data are shown in Fig. S6.

| Variable                         | 10 cm | 30 cm     | 80 cm     |
|----------------------------------|-------|-----------|-----------|
| Average Temp °C                  | 19.9  | 20.3      | 20.9      |
| Max Temp °C                      | 34.4  | 26.1      | 25.3      |
| Min Temp °C                      | 3.2   | 14.7      | 20.0      |
| Average %RH                      | 22.6  | 20.4      | 22.6      |
| Max %RH                          | 97.7  | 31.2      | 23.6      |
| Min %RH                          | 9.8   | 16.8      | 20.9      |
| hrs./yr. liquid water equivalent | 304   | Approx. 0 | Approx. 0 |



**Table S5.** Environmental DNA recovery from sediments recovered using the rover-mounted drill (DNA recovery for manual samples is shown in Table S2).

| Site | Sample depth (cm) | Site Type       | DNA ng/g |
|------|-------------------|-----------------|----------|
| 1    | 10-20             | Desert Pavement | 0.315    |
|      | 30-47             | Desert Pavement | 4.667    |
|      | 47-58             | Desert Pavement | 0.312    |
|      | 58-68             | Desert Pavement | 0.789    |
|      | 68-77             | Desert Pavement | <0.067   |
| 2    | Surface           | Desert Pavement | <0.067   |
|      | 20-46             | Desert Pavement | 6.4      |
| 6    | Surface           | Desert Pavement | <0.067   |
|      | 10                | Desert Pavement | <0.067   |
|      | 30                | Desert Pavement | <0.067   |
|      | 80                | Desert Pavement | <0.067   |
| 8    | Surface           | Playa           | <0.067   |
|      | 17-30             | Playa           | <0.067   |
|      | 30-60             | Playa           | <0.067   |
|      | 60-80             | Playa           | <0.067   |
|      | >60-80            | Playa           | <0.067   |
| 9    | Surface           | Playa           | <0.067   |
|      | 0-30              | Playa           | 1.4      |
|      | 30-60             | Playa           | <0.067   |
| 10   | Surface           | Playa           | <0.067   |
|      | 0-24              | Playa           | <0.067   |
|      | 0-30              | Playa           | <0.067   |
|      | 10-30             | Playa           | <0.067   |
|      | 24-71             | Playa           | 0.315    |
|      | 40-80             | Playa           | <0.067   |
| 11   | Surface           | Playa           | <0.067   |
|      | 0-10              | Playa           | <0.067   |
|      | 0-30              | Playa           | 0.597    |
|      | 10-30             | Playa           | 0.629    |
|      | 0-55              | Playa           | 0.848    |
|      | 33-63             | Playa           | <0.067   |
|      | 77-80             | Playa           | 0.277    |

**Table S6.** Sequencing read depth and alpha diversity metrics for successfully sequenced sediment samples.

| Site | Depth (cm) | Manual (M)/Drill (D) | Sequencing read depth | Species Richness (Chao 1) | Shannon's Index | Simpson Index | Pielou's Evenness |
|------|------------|----------------------|-----------------------|---------------------------|-----------------|---------------|-------------------|
| 1    | 0          | M                    | 8149                  | 164                       | 3.009           | 0.016         | 0.611             |
| 1    | 10         | M                    | 16472                 | 213                       | 3.429           | 0.029         | 0.677             |
| 1    | 20         | M                    | 33364                 | 166                       | 2.723           | 0.009         | 0.540             |
| 1    | 10 to 20   | D                    | 11899                 | 259                       | 3.752           | 0.029         | 0.694             |
| 1    | 30 to 47   | D                    | 33176                 | 303                       | 3.674           | 0.024         | 0.652             |
| 1    | 47 to 58   | D                    | 9281                  | 260                       | 3.522           | 0.021         | 0.652             |
| 1    | 58 to 68   | D                    | 9293                  | 247                       | 3.556           | 0.022         | 0.659             |
| 2    | 0          | M                    | 16860                 | 293                       | 3.052           | 0.012         | 0.549             |
| 2    | 0          | D                    | 18253                 | 122                       | 2.022           | 0.007         | 0.440             |
| 2    | 10         | M                    | 4324                  | 177                       | 3.807           | 0.040         | 0.757             |
| 2    | 20 to 46   | D                    | 3312                  | 221                       | 3.986           | 0.036         | 0.756             |
| 2    | 20         | M                    | 11048                 | 177                       | 2.894           | 0.010         | 0.579             |
| 2    | 30         | M                    | 9702                  | 107                       | 2.687           | 0.014         | 0.600             |
| 6    | 0          | M                    | 12496                 | 123                       | 3.113           | 0.023         | 0.661             |
| 6    | 0          | D                    | 49435                 | 116                       | 2.088           | 0.006         | 0.445             |
| 6    | 0          | D                    | 44735                 | 155                       | 2.284           | 0.008         | 0.467             |
| 6    | 0          | D                    | 47874                 | 141                       | 2.374           | 0.009         | 0.494             |
| 6    | 10         | M                    | 12088                 | 135                       | 3.023           | 0.019         | 0.636             |
| 6    | 10         | D                    | 31461                 | 176                       | 3.031           | 0.019         | 0.611             |
| 6    | 30         | D                    | 51539                 | 94                        | 0.426           | 0.002         | 0.097             |
| 8    | 10         | M                    | 5542                  | 197                       | 3.604           | 0.024         | 0.703             |
| 8    | 30         | M                    | 26198                 | 196                       | 3.519           | 0.026         | 0.676             |
| 8    | 50         | M                    | 83654                 | 86                        | 0.357           | 0.002         | 0.085             |
| 8    | 60 to 80   | D                    | 44442                 | 174                       | 2.076           | 0.005         | 0.407             |
| 8    | 70         | M                    | 65082                 | 85                        | 0.586           | 0.002         | 0.134             |
| 9    | 0          | M                    | 39729                 | 98                        | 2.108           | 0.007         | 0.484             |
| 11   | 0          | M                    | 39774                 | 210                       | 2.863           | 0.014         | 0.559             |
| 11   | 0          | D                    | 22482                 | 134                       | 2.511           | 0.010         | 0.526             |
| 11   | 20         | M                    | 46333                 | 207                       | 2.667           | 0.009         | 0.521             |
| 11   | 0 to 30    | D                    | 32794                 | 322                       | 3.980           | 0.046         | 0.704             |
